# Supplementary material
Source: ML conference proceedings conference paper supplement (https://proceedings.mlr.press/v97/metel19a.html)
Supplement: Supplementary file [file metel19a-supp.pdf]

---

## Simple Stochastic Gradient Methods for Non-Smooth Non-Convex Regularized Optimization: Supplementary Material

---

### 1. Proof of Lemma 2

**Lemma 2.** For an initial value  $w_1 \in \mathbb{R}^d$ ,  $N \in \mathbb{Z}_{>0}$ , and  $\alpha, \theta \in \mathbb{R}$ , MBSGA generates  $w^R$  satisfying the following bound.

$$\mathbb{E}\|\nabla E_\lambda^R(w^R)\|_2^2 \leq \frac{\tilde{\Delta}}{N}(L + N^\theta) + \frac{\sigma}{\sqrt{N}} \left( \tilde{\Delta} + \frac{L + N^\theta}{|N^\alpha|} \right),$$

where  $\tilde{\Delta} = 2(\tilde{h}_\lambda(w^1) - \tilde{h}_\lambda(w_\lambda^*))$  and  $w_\lambda^*$  is a global minimizer of  $\tilde{h}_\lambda(\cdot)$ .

In order to prove this result, we require the following property.

**Property 13.**

$$\mathbb{E}\|\nabla A_{\lambda M}^k(w^k, \xi^k) - \nabla E_\lambda^k(w^k)\|_2^2 \leq \frac{\sigma^2}{M}$$

*Proof.* From the definition of  $\nabla A_{\lambda M}^k(w^k, \xi^k)$  found in Algorithm 1 and (11),  $\nabla A_{\lambda M}^k(w^k, \xi^k) - \nabla E_\lambda^k(w^k) = \frac{1}{M} \sum_{j=1}^M \nabla F(w^k, \xi_j^k) - \nabla f(w^k)$ . Taking the expectation of its squared norm,

$$\begin{aligned} \mathbb{E}\|\nabla A_{\lambda M}^k(w^k, \xi^k) - \nabla E_\lambda^k(w^k)\|_2^2 &= \mathbb{E}\left\| \frac{1}{M} \sum_{j=1}^M (\nabla F(w^k, \xi_j^k) - \nabla f(w^k)) \right\|_2^2 \\ &= \frac{1}{M^2} \mathbb{E} \sum_{i=1}^n \left( \sum_{j=1}^M \nabla F(w^k, \xi_j^k)_i - \nabla f(w^k)_i \right)^2. \end{aligned}$$

For  $j \neq l$ ,  $\nabla F(w^k, \xi_j^k)_i - \nabla f(w^k)_i$  and  $\nabla F(w^k, \xi_l^k)_i - \nabla f(w^k)_i$  are independent random variables with zero mean. It follows that

$$\begin{aligned} \mathbb{E}[(\nabla F(w^k, \xi_j^k)_i - \nabla f(w^k)_i)(\nabla F(w^k, \xi_l^k)_i - \nabla f(w^k)_i)] &= \\ \mathbb{E}[(\nabla F(w^k, \xi_j^k)_i - \nabla f(w^k)_i)] \mathbb{E}[(\nabla F(w^k, \xi_l^k)_i - \nabla f(w^k)_i)] &= 0, \end{aligned}$$

and

$$\begin{aligned} \frac{1}{M^2} \mathbb{E} \sum_{i=1}^n \left( \sum_{j=1}^M \nabla F(w^k, \xi_j^k)_i - \nabla f(w^k)_i \right)^2 &= \frac{1}{M^2} \mathbb{E} \sum_{i=1}^n \sum_{j=1}^M (\nabla F(w^k, \xi_j^k)_i - \nabla f(w^k)_i)^2 \\ &= \frac{1}{M^2} \sum_{j=1}^M \mathbb{E}\|\nabla F(w^k, \xi_j^k) - \nabla f(w^k)\|_2^2 \leq \frac{\sigma^2}{M} \end{aligned}$$

using (5). □

*Proof of Lemma 2.* Given the smoothness of  $E_\lambda^k(w)$  as shown in Property 1,

$$\begin{aligned} E_\lambda^k(w^{k+1}) &\leq E_\lambda^k(w^k) + \langle \nabla E_\lambda^k(w^k), w^{k+1} - w^k \rangle + \frac{L_{E\lambda}}{2} \|w^{k+1} - w^k\|_2^2 \\ &= E_\lambda^k(w^k) + \langle \nabla E_\lambda^k(w^k), -\gamma \nabla A_{\lambda M}^k(w^k, \xi^k) \rangle + \frac{L_{E\lambda}}{2} \|-\gamma \nabla A_{\lambda M}^k(w^k, \xi^k)\|_2^2. \end{aligned}$$

Using (12) and (13),

$$\tilde{h}(w^{k+1}) \leq \tilde{h}(w^k) - \gamma \langle \nabla E_\lambda^k(w^k), \nabla A_{\lambda M}^k(w^k, \xi^k) \rangle + \frac{L_{E\lambda}}{2} \gamma^2 \|\nabla A_{\lambda M}^k(w^k, \xi^k)\|_2^2.$$

Setting  $\delta_k = \nabla A_{\lambda M}^k(w^k, \xi^k) - \nabla E_\lambda^k(w^k)$ ,

$$\begin{aligned} \tilde{h}(w^{k+1}) &\leq \tilde{h}(w^k) - \gamma (\|\nabla E_\lambda^k(w^k)\|_2^2 + \langle \nabla E_\lambda^k(w^k), \delta_k \rangle) + \frac{L_{E\lambda}}{2} \gamma^2 (\|\nabla E_\lambda^k(w^k)\|_2^2 + 2\langle \nabla E_\lambda^k(w^k), \delta_k \rangle + \|\delta_k\|_2^2) \\ &= \tilde{h}(w^k) + \left( \frac{L_{E\lambda}}{2} \gamma^2 - \gamma \right) \|\nabla E_\lambda^k(w^k)\|_2^2 + (L_{E\lambda} \gamma^2 - \gamma) \langle \nabla E_\lambda^k(w^k), \delta_k \rangle + \frac{L_{E\lambda}}{2} \gamma^2 \|\delta_k\|_2^2, \end{aligned}$$

as

$$\langle \nabla E_\lambda^k(w^k), \nabla A_{\lambda M}^k(w^k, \xi^k) \rangle = \|\nabla E_\lambda^k(w^k)\|_2^2 + \langle \nabla E_\lambda^k(w^k), \delta_k \rangle$$

and

$$\|\nabla A_{\lambda M}^k(w^k, \xi^k)\|_2^2 = \|\nabla E_\lambda^k(w^k)\|_2^2 + 2\langle \nabla E_\lambda^k(w^k), \delta_k \rangle + \|\delta_k\|_2^2.$$

After  $N$  iterations,

$$\begin{aligned} \left( \gamma - \frac{L_{E\lambda}}{2} \gamma^2 \right) \sum_{k=1}^N \|\nabla E_\lambda^k(w^k)\|_2^2 &\leq \tilde{h}(w^1) - \tilde{h}(w^{N+1}) + (L_{E\lambda} \gamma^2 - \gamma) \sum_{k=1}^N \langle \nabla E_\lambda^k(w^k), \delta_k \rangle + \frac{L_{E\lambda}}{2} \gamma^2 \sum_{k=1}^N \|\delta_k\|_2^2 \\ &\leq \tilde{h}_\lambda(w^1) - \tilde{h}_\lambda(w_\lambda^*) + (L_{E\lambda} \gamma^2 - \gamma) \sum_{k=1}^N \langle \nabla E_\lambda^k(w^k), \delta_k \rangle + \frac{L_{E\lambda}}{2} \gamma^2 \sum_{k=1}^N \|\delta_k\|_2^2. \end{aligned}$$

It follows from (4) that for  $w$  independent of  $\xi^k$ ,  $\mathbb{E} \nabla A_{\lambda M}^k(w, \xi^k) = \nabla E_\lambda^k(w)$ , and so  $\mathbb{E}[\delta_k] = 0$ . Taking the expectation of both sides,

$$\begin{aligned} \left( \gamma - \frac{L_{E\lambda}}{2} \gamma^2 \right) \sum_{k=1}^N \mathbb{E} \|\nabla E_\lambda^k(w^k)\|_2^2 &\leq \tilde{h}(w^1) - \tilde{h}(w_\lambda^*) + \frac{L_{E\lambda}}{2} \gamma^2 \sum_{k=1}^N \mathbb{E} \|\delta_k\|_2^2 \\ &\leq \tilde{h}(w^1) - \tilde{h}(w_\lambda^*) + \frac{L_{E\lambda}}{2} \gamma^2 \frac{N}{M} \sigma^2, \end{aligned}$$

where the second inequality uses Property 13. Choosing  $R$  uniformly over  $\{1, \dots, N\}$ ,

$$\begin{aligned} \mathbb{E} \|\nabla E_\lambda^R(w^R)\|_2^2 &= \frac{1}{N} \sum_{k=1}^N \mathbb{E} \|\nabla E_\lambda^k(w^k)\|_2^2 \\ &\leq \frac{1}{N (\gamma - \frac{L_{E\lambda}}{2} \gamma^2)} \left( \tilde{h}(w^1) - \tilde{h}(w_\lambda^*) + \frac{L_{E\lambda}}{2} \gamma^2 \frac{N}{M} \sigma^2 \right). \end{aligned}$$

Since  $\gamma \leq \frac{1}{L_{E\lambda}}$ , it holds that  $\gamma - \frac{L_{E\lambda}}{2} \gamma^2 \geq \frac{1}{2} \gamma$ , and

$$\begin{aligned} \frac{1}{N (\gamma - \frac{L_{E\lambda}}{2} \gamma^2)} \left( \frac{\tilde{\Delta}}{2} + \frac{L_{E\lambda}}{2} \gamma^2 \frac{N}{M} \sigma^2 \right) &\leq \frac{1}{N \gamma} \left( \tilde{\Delta} + L_{E\lambda} \gamma^2 \frac{N}{M} \sigma^2 \right) \\ &= \frac{\tilde{\Delta}}{N \gamma} + L_{E\lambda} \frac{\gamma}{M} \sigma^2 \\ &\leq \frac{\tilde{\Delta}}{N} \max \{ L_{E\lambda}, \sigma \sqrt{N} \} + L_{E\lambda} \frac{\sigma}{M \sqrt{N}} \\ &\leq \frac{\tilde{\Delta} L_{E\lambda}}{N} + \frac{\sigma}{\sqrt{N}} \left( \tilde{\Delta} + \frac{L_{E\lambda}}{M} \right) \\ &= \frac{\tilde{\Delta}}{N} (L + N^\theta) + \frac{\sigma}{\sqrt{N}} \left( \tilde{\Delta} + \frac{L + N^\theta}{[N^\alpha]} \right) \end{aligned}$$

□

## 2. Proof of Lemma 7

**Lemma 7.** For an initial value  $\tilde{w}_1 \in \mathbb{R}^d$ ,  $N \in \mathbb{Z}_{>0}$ ,  $\alpha, \theta \in \mathbb{R}$ , VRSGA generates  $w_T^R$  satisfying the following bound.

$$\mathbb{E} [\|\nabla E_{T\lambda}^R(w_T^R)\|_2^2] \leq \tilde{\Delta} \frac{L + (Sm)^\theta}{Sm},$$

where  $\tilde{\Delta} = 36(\tilde{h}_\lambda(\tilde{w}^1) - \tilde{h}_\lambda(w_\lambda^*))$  and  $w_\lambda^*$  is a global minimizer of  $\tilde{h}_\lambda(\cdot)$ .

In order to prove this result, we require the following lemmas.

**Lemma 14.** Consider arbitrary  $w, V, z \in \mathbb{R}^d$ ,  $\gamma \in \mathbb{R}$ , and  $w^+ = w - \gamma V$ ,

$$E_{t\lambda}^k(w^+) \leq E_{t\lambda}^k(z) + \langle \nabla E_{t\lambda}^k(w) - V, w^+ - z \rangle + \frac{L_{E\lambda}}{2} \|w^+ - w\|_2^2 + \frac{L_{E\lambda}}{2} \|z - w\|_2^2 - \frac{1}{\gamma} \langle w^+ - w, w^+ - z \rangle.$$

*Proof.* Adding the following three inequalities proves the result, where the first two come from the smoothness of  $E_{t\lambda}^k(w)$  and  $-E_{t\lambda}^k(w)$ , see Property 1, and the third is due to  $V + \frac{1}{\gamma}(w^+ - w) = 0$ .

$$\begin{aligned} E_{t\lambda}^k(w^+) &\leq E_{t\lambda}^k(w) + \langle \nabla E_{t\lambda}^k(w), w^+ - w \rangle + \frac{L_{E\lambda}}{2} \|w^+ - w\|_2^2 \\ -E_{t\lambda}^k(z) &\leq -E_{t\lambda}^k(w) + \langle -\nabla E_{t\lambda}^k(w), z - w \rangle + \frac{L_{E\lambda}}{2} \|z - w\|_2^2 \\ 0 &= -\langle V + \frac{1}{\gamma}(w^+ - w), w^+ - z \rangle \end{aligned}$$

□

**Lemma 15.** For vectors  $w, x, z$ , and  $\beta > 0$ ,

$$\|w - x\|_2^2 \leq (1 + \beta) \|w - z\|_2^2 + \left(1 + \frac{1}{\beta}\right) \|z - x\|_2^2.$$

*Proof.*

$$\begin{aligned} \|w - x\|_2^2 &= \|w - z + z - x\|_2^2 \\ &\leq (\|w - z\|_2 + \|z - x\|_2)^2 \\ &= \|w - z\|_2^2 + 2\|w - z\|_2 \|z - x\|_2 + \|z - x\|_2^2 \\ &\leq \|w - z\|_2^2 + \left(\beta \|w - z\|_2^2 + \frac{1}{\beta} \|z - x\|_2^2\right) + \|z - x\|_2^2 \\ &= (1 + \beta) \|w - z\|_2^2 + \left(1 + \frac{1}{\beta}\right) \|z - x\|_2^2, \end{aligned}$$

where the second inequality uses Young's inequality.

□

*Proof of Lemma 7.* Let  $\hat{w}_{t+1}^k = w_t^k - \gamma \nabla E_{t\lambda}^k(w_t^k)$ , with  $w^+ = w_{t+1}^k$ ,  $w = w_t^k$ ,  $V = V_t^k$ , and  $z = \hat{w}_{t+1}^k$  in Lemma 14 to get the inequality

$$\begin{aligned} E_{t\lambda}^k(w_{t+1}^k) &\leq E_{t\lambda}^k(\hat{w}_{t+1}^k) + \langle \nabla E_{t\lambda}^k(w_t^k) - V_t^k, w_{t+1}^k - \hat{w}_{t+1}^k \rangle + \frac{L_{E\lambda}}{2} \|w_{t+1}^k - w_t^k\|_2^2 \\ &\quad + \frac{L_{E\lambda}}{2} \|\hat{w}_{t+1}^k - w_t^k\|_2^2 - \frac{1}{\gamma} \langle w_{t+1}^k - w_t^k, w_{t+1}^k - \hat{w}_{t+1}^k \rangle. \end{aligned} \tag{16}$$

In addition, let  $w^+ = \hat{w}_{t+1}^k$ ,  $w = w_t^k$ ,  $V = \nabla E_{t\lambda}^k(w_t^k)$ , and  $z = w_t^k$  in Lemma 14 to get

$$\begin{aligned} E_{t\lambda}^k(\hat{w}_{t+1}^k) &\leq E_{t\lambda}^k(w_t^k) + \langle \nabla E_{t\lambda}^k(w_t^k) - \nabla E_{t\lambda}^k(w_t^k), \hat{w}_{t+1}^k - w_t^k \rangle + \frac{LE\lambda}{2} \|\hat{w}_{t+1}^k - w_t^k\|_2^2 \\ &\quad + \frac{LE\lambda}{2} \|w_t^k - w_t^k\|_2^2 - \frac{1}{\gamma} \langle \hat{w}_{t+1}^k - w_t^k, \hat{w}_{t+1}^k - w_t^k \rangle \\ &= E_{t\lambda}^k(w_t^k) + \left( \frac{LE\lambda}{2} - \frac{1}{\gamma} \right) \|\hat{w}_{t+1}^k - w_t^k\|_2^2. \end{aligned} \quad (17)$$

Adding (16) and (17),

$$\begin{aligned} E_{t\lambda}^k(w_{t+1}^k) &\leq E_{t\lambda}^k(w_t^k) + \langle \nabla E_{t\lambda}^k(w_t^k) - V_t^k, w_{t+1}^k - \hat{w}_{t+1}^k \rangle + \frac{LE\lambda}{2} \|w_{t+1}^k - w_t^k\|_2^2 \\ &\quad - \frac{1}{\gamma} \langle w_{t+1}^k - w_t^k, w_{t+1}^k - \hat{w}_{t+1}^k \rangle + \left( LE\lambda - \frac{1}{\gamma} \right) \|\hat{w}_{t+1}^k - w_t^k\|_2^2. \end{aligned} \quad (18)$$

Plugging  $\langle w_{t+1}^k - w_t^k, w_{t+1}^k - \hat{w}_{t+1}^k \rangle = \frac{1}{2} (\|w_{t+1}^k - w_t^k\|_2^2 + \|w_{t+1}^k - \hat{w}_{t+1}^k\|_2^2 - \|\hat{w}_{t+1}^k - w_t^k\|_2^2)$  into (18) and rearranging,

$$\begin{aligned} E_{t\lambda}^k(w_{t+1}^k) &\leq E_{t\lambda}^k(w_t^k) + \langle \nabla E_{t\lambda}^k(w_t^k) - V_t^k, w_{t+1}^k - \hat{w}_{t+1}^k \rangle + \left( \frac{LE\lambda}{2} - \frac{1}{2\gamma} \right) \|w_{t+1}^k - w_t^k\|_2^2 \\ &\quad - \frac{1}{2\gamma} \|w_{t+1}^k - \hat{w}_{t+1}^k\|_2^2 + \left( LE\lambda - \frac{1}{2\gamma} \right) \|\hat{w}_{t+1}^k - w_t^k\|_2^2. \end{aligned} \quad (19)$$

Focusing on the term  $-\frac{1}{2\gamma} \|w_{t+1}^k - \hat{w}_{t+1}^k\|_2^2$ , we apply Lemma 15 with  $w = w_{t+1}^k$ ,  $x = w_t^k$ , and  $z = \hat{w}_{t+1}^k$ . Rearranging,

$$\begin{aligned} -(1 + \beta) \|w_{t+1}^k - \hat{w}_{t+1}^k\|_2^2 &\leq -\|w_{t+1}^k - w_t^k\|_2^2 + \left( 1 + \frac{1}{\beta} \right) \|\hat{w}_{t+1}^k - w_t^k\|_2^2 \\ -\frac{1}{2\gamma} \|w_{t+1}^k - \hat{w}_{t+1}^k\|_2^2 &\leq -\frac{1}{(1 + \beta)2\gamma} \|w_{t+1}^k - w_t^k\|_2^2 + \frac{\left( 1 + \frac{1}{\beta} \right)}{(1 + \beta)2\gamma} \|\hat{w}_{t+1}^k - w_t^k\|_2^2. \end{aligned}$$

Choosing  $\beta = 3$ ,

$$-\frac{1}{2\gamma} \|w_{t+1}^k - \hat{w}_{t+1}^k\|_2^2 \leq -\frac{1}{8\gamma} \|w_{t+1}^k - w_t^k\|_2^2 + \frac{1}{6\gamma} \|\hat{w}_{t+1}^k - w_t^k\|_2^2.$$

Using this inequality in (19),

$$\begin{aligned} E_{t\lambda}^k(w_{t+1}^k) &\leq E_{t\lambda}^k(w_t^k) + \langle \nabla E_{t\lambda}^k(w_t^k) - V_t^k, w_{t+1}^k - \hat{w}_{t+1}^k \rangle + \left( \frac{LE\lambda}{2} - \frac{1}{2\gamma} \right) \|w_{t+1}^k - w_t^k\|_2^2 \\ &\quad - \frac{1}{8\gamma} \|w_{t+1}^k - w_t^k\|_2^2 + \frac{1}{6\gamma} \|\hat{w}_{t+1}^k - w_t^k\|_2^2 + \left( LE\lambda - \frac{1}{2\gamma} \right) \|\hat{w}_{t+1}^k - w_t^k\|_2^2 \\ &= E_{t\lambda}^k(w_t^k) + \langle \nabla E_{t\lambda}^k(w_t^k) - V_t^k, w_{t+1}^k - \hat{w}_{t+1}^k \rangle + \left( \frac{LE\lambda}{2} - \frac{5}{8\gamma} \right) \|w_{t+1}^k - w_t^k\|_2^2 \\ &\quad + \left( LE\lambda - \frac{1}{3\gamma} \right) \|\hat{w}_{t+1}^k - w_t^k\|_2^2 \\ &= E_{t\lambda}^k(w_t^k) + \gamma \|\nabla E_{t\lambda}^k(w_t^k) - V_t^k\|_2^2 + \left( \frac{LE\lambda}{2} - \frac{5}{8\gamma} \right) \|w_{t+1}^k - w_t^k\|_2^2 + \left( LE\lambda - \frac{1}{3\gamma} \right) \|\hat{w}_{t+1}^k - w_t^k\|_2^2, \end{aligned}$$

where the last equality holds since  $w_{t+1}^k - \hat{w}_{t+1}^k = \gamma(\nabla E_{t\lambda}^k(w_t^k) - V_t^k)$ . Using (12) and (13), and taking the expectation of both sides,

$$\mathbb{E} \tilde{h}_\lambda(w_{t+1}^k) \leq \mathbb{E} \left[ \tilde{h}_\lambda(w_t^k) + \gamma \|\nabla E_{t\lambda}^k(w_t^k) - V_t^k\|_2^2 + \left( \frac{LE\lambda}{2} - \frac{5}{8\gamma} \right) \|w_{t+1}^k - w_t^k\|_2^2 + \left( LE\lambda - \frac{1}{3\gamma} \right) \|\hat{w}_{t+1}^k - w_t^k\|_2^2 \right]. \quad (20)$$

Focusing on  $\mathbb{E} [\|\nabla E_{t\lambda}^k(w_t^k) - V_t^k\|_2^2]$ , from (11) and the definition of  $V_t^k$  found in Algorithm 2,  $\nabla E_{t\lambda}^k(w_t^k) - V_t^k = \nabla f(w_t^k) - (\frac{1}{b} \sum_{j \in I} (\nabla f_j(w_t^k) - \nabla f_j(\tilde{w}^k)) + G^k)$ . Rearranging, and taking the expectation of its squared norm,

$$\begin{aligned} \mathbb{E} \|\nabla E_{t\lambda}^k(w_t^k) - V_t^k\|_2^2 &= \mathbb{E} \left\| \frac{1}{b} \sum_{j \in I} (\nabla f_j(\tilde{w}^k) - \nabla f_j(w_t^k)) - (G^k - \nabla f(w_t^k)) \right\|_2^2 \\ &= \frac{1}{b^2} \mathbb{E} \sum_{j \in I} \|\nabla f_j(\tilde{w}^k) - \nabla f_j(w_t^k) - (G^k - \nabla f(w_t^k))\|_2^2 \\ &\leq \frac{1}{b^2} \mathbb{E} \sum_{j \in I} \|\nabla f_j(\tilde{w}^k) - \nabla f_j(w_t^k)\|_2^2 \\ &\leq \frac{L^2}{b} \mathbb{E} \|\tilde{w}^k - w_t^k\|_2^2. \end{aligned}$$

As the squared norm of a sum of independent random variables with zero mean, the second equality holds using the same reasoning as found in Property 13, and the first inequality holds since  $\mathbb{E} \|x - \mathbb{E}[x]\|_2^2 \leq \mathbb{E} \|x\|_2^2$  for any random variable  $x$ . Using this bound in (20),

$$\begin{aligned} \mathbb{E} \tilde{h}_\lambda(w_{t+1}^k) &\leq \mathbb{E} \left[ \tilde{h}_\lambda(w_t^k) + \gamma \frac{L^2}{b} \|\tilde{w}^k - w_t^k\|_2^2 + \left( \frac{L_{E\lambda}}{2} - \frac{5}{8\gamma} \right) \|w_{t+1}^k - w_t^k\|_2^2 + \left( L_{E\lambda} - \frac{1}{3\gamma} \right) \|\hat{w}_{t+1}^k - w_t^k\|_2^2 \right] \\ &\leq \mathbb{E} \left[ \tilde{h}_\lambda(w_t^k) + \frac{L_{E\lambda}}{6b} \|\tilde{w}^k - w_t^k\|_2^2 - \frac{13L_{E\lambda}}{4} \|w_{t+1}^k - w_t^k\|_2^2 - L_{E\lambda} \|\hat{w}_{t+1}^k - w_t^k\|_2^2 \right] \\ &= \mathbb{E} \left[ \tilde{h}_\lambda(w_t^k) + \frac{L_{E\lambda}}{6b} \|\tilde{w}^k - w_t^k\|_2^2 - \frac{13L_{E\lambda}}{4} \|w_{t+1}^k - w_t^k\|_2^2 - \frac{1}{36L_{E\lambda}} \|\nabla E_{t\lambda}^k(w_t^k)\|_2^2 \right], \quad (21) \end{aligned}$$

where the last two lines use the fact that  $\gamma = \frac{1}{6L_{E\lambda}}$ . Focusing on  $-\frac{13L_{E\lambda}}{4} \|w_{t+1}^k - w_t^k\|_2^2$ , we apply Lemma 15 with  $w = w_{t+1}^k$ ,  $x = \tilde{w}^k$ , and  $z = w_t^k$ ,

$$\begin{aligned} (1 + \beta) \|w_{t+1}^k - w_t^k\|_2^2 &\geq \|w_{t+1}^k - \tilde{w}^k\|_2^2 - \left( 1 + \frac{1}{\beta} \right) \|w_t^k - \tilde{w}^k\|_2^2 \\ -\frac{13L_{E\lambda}}{4} \|w_{t+1}^k - w_t^k\|_2^2 &\leq -\frac{13L_{E\lambda}}{4(1 + \beta)} \|w_{t+1}^k - \tilde{w}^k\|_2^2 + \frac{13L_{E\lambda}}{4(1 + \beta)} \left( 1 + \frac{1}{\beta} \right) \|w_t^k - \tilde{w}^k\|_2^2. \end{aligned}$$

Setting  $\beta = 2t - 1$ ,

$$-\frac{13L_{E\lambda}}{4} \|w_{t+1}^k - w_t^k\|_2^2 \leq -\frac{13L_{E\lambda}}{8t} \|w_{t+1}^k - \tilde{w}^k\|_2^2 + \frac{13L_{E\lambda}}{8t - 4} \|w_t^k - \tilde{w}^k\|_2^2.$$

Applying this bound in (21),

$$\mathbb{E} \tilde{h}_\lambda(w_{t+1}^k) \leq \mathbb{E} \left[ \tilde{h}_\lambda(w_t^k) + \left( \frac{L_{E\lambda}}{6b} + \frac{13L_{E\lambda}}{8t - 4} \right) \|\tilde{w}^k - w_t^k\|_2^2 - \frac{13L_{E\lambda}}{8t} \|w_{t+1}^k - \tilde{w}^k\|_2^2 - \frac{1}{36L_{E\lambda}} \|\nabla E_{t\lambda}^k(w_t^k)\|_2^2 \right].$$

Summing over  $t$ ,

$$\begin{aligned} \mathbb{E} \tilde{h}_\lambda(w_{m+1}^k) &\leq \mathbb{E} \left[ \tilde{h}_\lambda(w_1^k) + \sum_{t=1}^m \left( \frac{L_{E\lambda}}{6b} + \frac{13L_{E\lambda}}{8t - 4} \right) \|\tilde{w}^k - w_t^k\|_2^2 \right. \\ &\quad \left. - \sum_{t=1}^m \frac{13L_{E\lambda}}{8t} \|w_{t+1}^k - \tilde{w}^k\|_2^2 - \frac{1}{36L_{E\lambda}} \sum_{t=1}^m \|\nabla E_{t\lambda}^k(w_t^k)\|_2^2 \right]. \end{aligned}$$

Considering that  $\tilde{w}^k = w_1^k$  and  $\|w_{m+1}^k - \tilde{w}^k\|_2^2 \geq 0$ ,

$$\begin{aligned}
 \mathbb{E}\tilde{h}_\lambda(w_{m+1}^k) &\leq \mathbb{E}\left[\tilde{h}_\lambda(w_1^k) + \sum_{t=2}^m \left(\frac{LE\lambda}{6b} + \frac{13LE\lambda}{8t-4}\right) \|\tilde{w}^k - w_t^k\|_2^2 \right. \\
 &\quad \left. - \sum_{t=1}^{m-1} \frac{13LE\lambda}{8t} \|w_{t+1}^k - \tilde{w}^k\|_2^2 - \frac{1}{36LE\lambda} \sum_{t=1}^m \|\nabla E_{t\lambda}^k(w_t^k)\|_2^2\right] \\
 &= \mathbb{E}\left[\tilde{h}_\lambda(w_1^k) + \sum_{t=1}^{m-1} \left(\frac{LE\lambda}{6b} + \frac{13LE\lambda}{8t+4} - \frac{13LE\lambda}{8t}\right) \|w_{t+1}^k - \tilde{w}^k\|_2^2 - \frac{1}{36LE\lambda} \sum_{t=1}^m \|\nabla E_{t\lambda}^k(w_t^k)\|_2^2\right] \\
 &\leq \mathbb{E}\left[\tilde{h}_\lambda(w_1^k) + \sum_{t=1}^{m-1} \left(\frac{LE\lambda}{6b} - \frac{LE\lambda}{2t^2}\right) \|w_{t+1}^k - \tilde{w}^k\|_2^2 - \frac{1}{36LE\lambda} \sum_{t=1}^m \|\nabla E_{t\lambda}^k(w_t^k)\|_2^2\right] \\
 &\leq \mathbb{E}\left[\tilde{h}_\lambda(w_1^k) - \frac{1}{36LE\lambda} \sum_{t=1}^m \|\nabla E_{t\lambda}^k(w_t^k)\|_2^2\right],
 \end{aligned}$$

where the last inequality holds since  $6b = 6m^2 > 2(m-1)^2 \geq 2t^2$  for  $t = 1, \dots, m-1$ . This summation can be equivalently written as

$$\begin{aligned}
 \mathbb{E}\tilde{h}_\lambda(\tilde{w}^{k+1}) &\leq \mathbb{E}\tilde{h}_\lambda(\tilde{w}^k) - \mathbb{E}\left[\frac{1}{36LE\lambda} \sum_{t=1}^m \|\nabla E_{t\lambda}^k(w_t^k)\|_2^2\right] \\
 &\leq \mathbb{E}\left[\frac{1}{36LE\lambda} \sum_{t=1}^m \|\nabla E_{t\lambda}^k(w_t^k)\|_2^2\right] \leq \mathbb{E}\tilde{h}_\lambda(\tilde{w}^k) - \mathbb{E}\tilde{h}_\lambda(\tilde{w}^{k+1}) \\
 \mathbb{E}\left[\frac{1}{36LE\lambda} \sum_{k=1}^S \sum_{t=1}^m \|\nabla E_{t\lambda}^k(w_t^k)\|_2^2\right] &\leq \tilde{h}_\lambda(\tilde{w}^1) - \mathbb{E}\tilde{h}_\lambda(\tilde{w}^{S+1}) \\
 &\leq \tilde{h}_\lambda(\tilde{w}^1) - \tilde{h}_\lambda(w_\lambda^*) \\
 \mathbb{E}[\|\nabla E_{T\lambda}^R(w_T^R)\|_2^2] &\leq \frac{36LE\lambda \left(\tilde{h}_\lambda(\tilde{w}^1) - \tilde{h}_\lambda(w_\lambda^*)\right)}{Sm} \\
 &= \tilde{\Delta} \frac{L + (Sm)^\theta}{Sm}.
 \end{aligned}$$

□

### 3. Implementation details of SSD-SPG and SSD-SVRG

In this section we describe all chosen parameter values using the notation found in (Xu et al., 2018). The algorithm SSDC-SPG calls a stochastic proximal gradient (SPG) algorithm  $K$  times. For the  $k^{th}$  iteration, the number of iterations of SPG equals  $T_k = 4k$ . Each iteration of SPG uses one gradient call. We used the minimum  $K$  which ensured at least  $en$  gradient calls were used. The convex majorant parameter  $\gamma = 3L$ , and the step size  $\eta_t = 1/(L(t+1))$ . The Moreau envelope parameter  $\mu = \epsilon$ , where  $K = O(1/\epsilon^4)$ , is the only non-explicitly given parameter, which we set to  $\mu = 1/(K^{\frac{1}{4}})$ . SSDC-SVRG calls a stochastic variance reduced gradient (SVRG) algorithm  $K$  times. We set the inner loop length  $T_k = \max(2, 200L/\gamma)$ , and the outer loop length  $S_k = \lceil \log_2(k) \rceil$ . The step size  $\eta_k = 0.05/L$ . Two parameters are not explicitly given, similar to in SSDC-SPG, we set  $\mu = 1/(K^{\frac{1}{4}})$ . For these parameter settings, there seems to be no restriction on  $\gamma$ . Their SVRG algorithm is based off of the work of Xiao & Zhang (2014), where empirical testing of different sizes of  $T_k$  was done for a binary classification problem. The best performance was found with a choice of  $T_k = 2n$ , from which we were able to determine  $\gamma$ . Given  $\gamma$ , we were then able to solve for  $K$ , ensuring at least  $en$  gradient calls were used.

## **References**

- Xiao, L. and Zhang, T. A proximal stochastic gradient method with progressive variance reduction. *SIAM Journal on Optimization*, 24(4):2057–2075, 2014.
- Xu, Y., Qi, Q., Lin, Q., Jin, R., and Yang, T. Stochastic optimization for DC functions and non-smooth non-convex regularizers with non-asymptotic convergence. *arXiv preprint arXiv:1811.11829v1*, Access date: December 3, 2018.
